# Supplementary material
Source: PubMed Central journal article supplement (PMC6542601)
Supplement: jciinsight-4-124460-s268.pdf [file jciinsight-4-124460-s268.pdf]

## Supplementary Movie Legends:

**Movie S1.** 4-D reconstructed video of control embryonic zebrafish heart at 5 dpf. Video represents a loop of one cardiac cycle of a beating heart from a *Tg(fli1a:GFP)* zebrafish embryo. Scale bar, 50  $\mu\text{m}$ .

**Movie S2.** 4-D reconstructed video of BDM-treated embryonic zebrafish heart at 5 dpf. Video represents a loop of one cardiac cycle of a beating heart from a *Tg(fli1a:GFP)* zebrafish embryo that was treated with BDM (10 mM) starting at 24 hpf. Scale bar, 50  $\mu\text{m}$ .

**Movie S3.** 4-D reconstructed video of isoproterenol-treated embryonic zebrafish heart at 5 dpf. Video represents a loop of one cardiac cycle of a beating heart from a *Tg(fli1a:GFP)* zebrafish embryo that was treated with isoproterenol (100  $\mu\text{M}$ ) starting at 24 hpf. Scale bar, 50  $\mu\text{m}$ .

**Movie S4.** 4-D reconstructed video of the heart of *NICD* mRNA-injected embryo at 5 dpf. Video represents a loop of one cardiac cycle of a beating heart from a *Tg(fli1a:GFP)* zebrafish embryo that was micro-injected with *NICD* mRNA at the one-to-two cell stage. Scale bar, 50  $\mu\text{m}$ .
